# Supplementary material for: Atom mapping with constraint programming
Source: Springer Nature journal article supplement (doi:10.1186/s13015-014-0023-3), 2014-11-28
Supplement: 13015_2014_23_MOESM1_ESM.pdf [file 13015_2014_23_MOESM1_ESM.pdf]

# Atom Mapping with Constraint Programming

## Supplementary Material

Martin Mann, Feras Nahar, Norah Schnorr, Rolf Backofen,  
Peter F. Stadler and Christoph Flamm

### S1 Reaction R01440

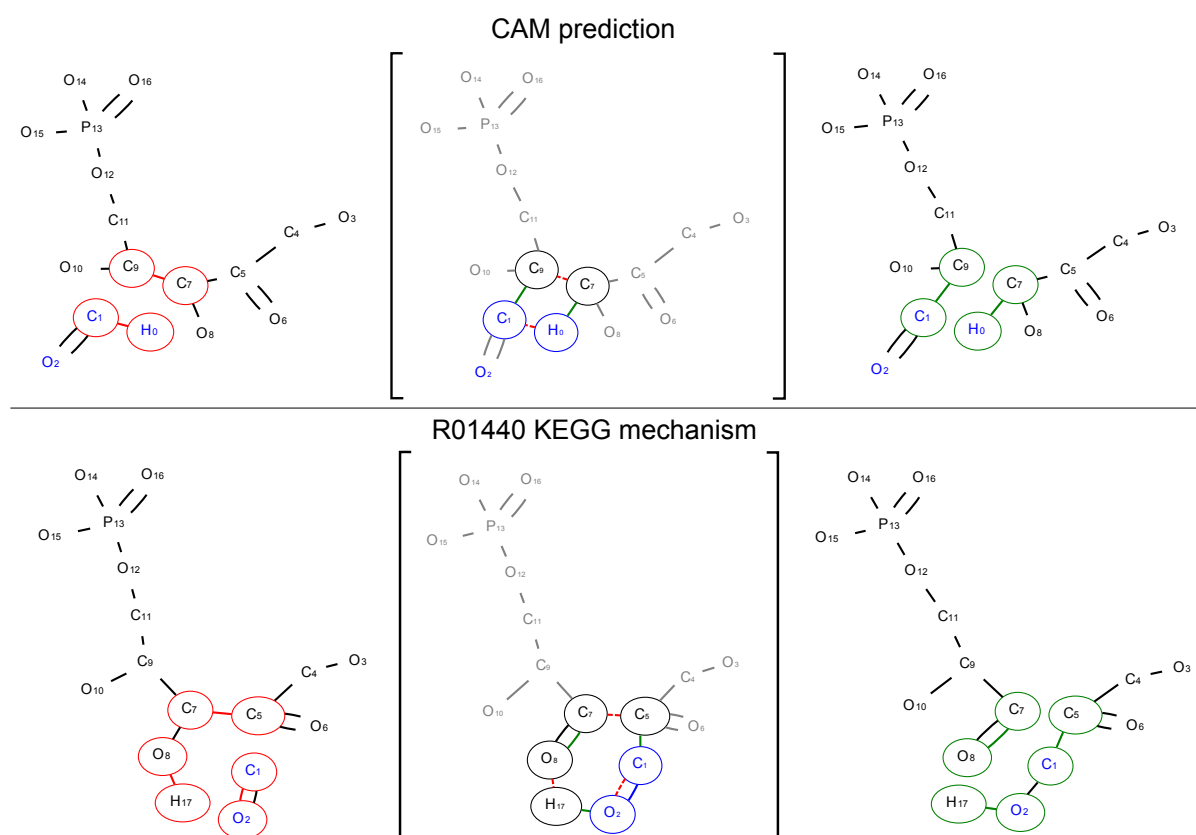

Figure S1: Reaction R01440 (top) CAM-predicted mechanism based on a homovalent ITS cycle of 4 atoms and (bottom) the 6-atom cycle according to the mechanism stored in the KEGG database. The center graph represents the ITS. Red bonds are broken from left to right while green bonds are formed. Blue atoms belong to the C=O molecule from the left side.
